# Supplementary material
Source: PubMed Central journal article supplement (PMC2585018)
Supplement: 00159.2007_1.pdf [file 00159.2007_1.pdf]

# Supplementary Material

## Figure 7

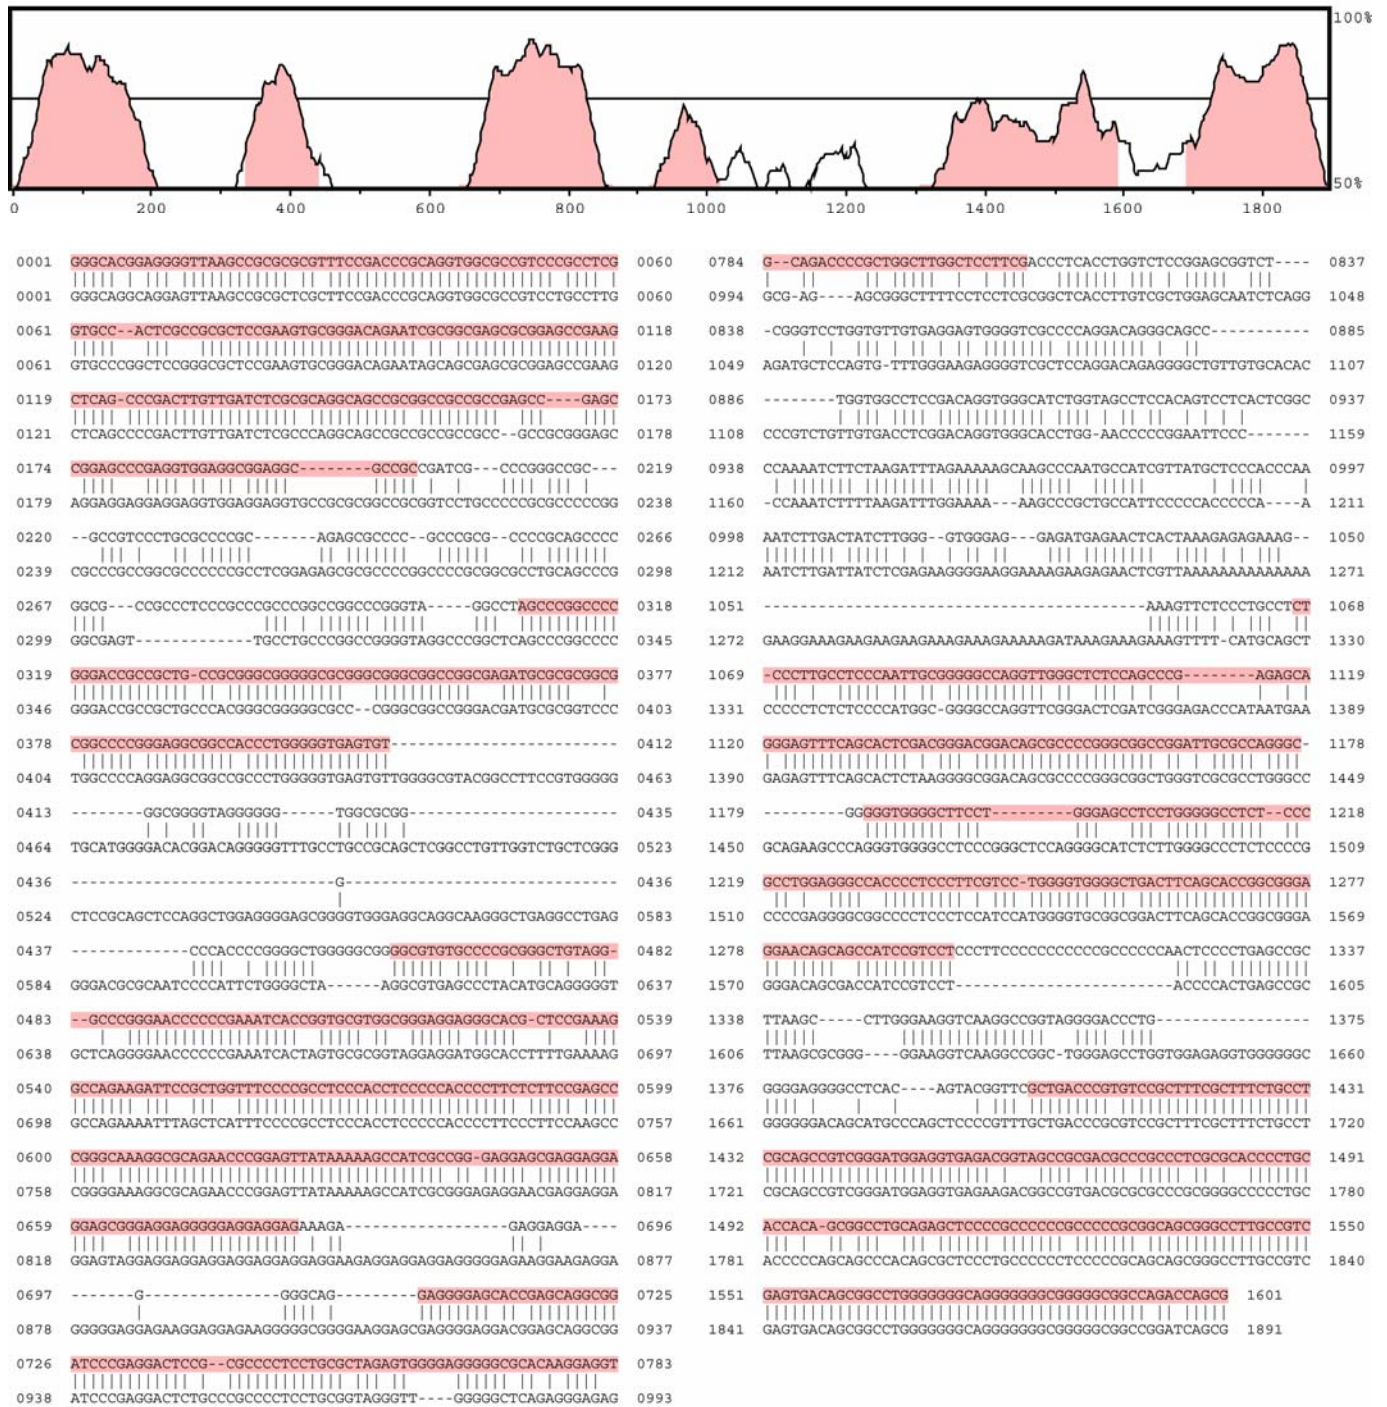

Comparison of the upstream regulatory sequences of the mouse and human Kv2.1 genes performed using the Vista alignment program (mouse is upper sequence in the sequence alignment). In the alignment a set of highly conserved features were found to be separated by poorly conserved sequences. The conserved sequences provided unambiguous landmarks for comparisons between the sequences. The selected regions were not identical in length. Differences in length were largely due to insertions or deletions in non-conserved or highly repetitive regions. The selected sequences extend to the initiator methionine of exon 1 of the Kv2.1 gene and makes no assumptions about the exact location of the transcription start site.

**Figure 8**

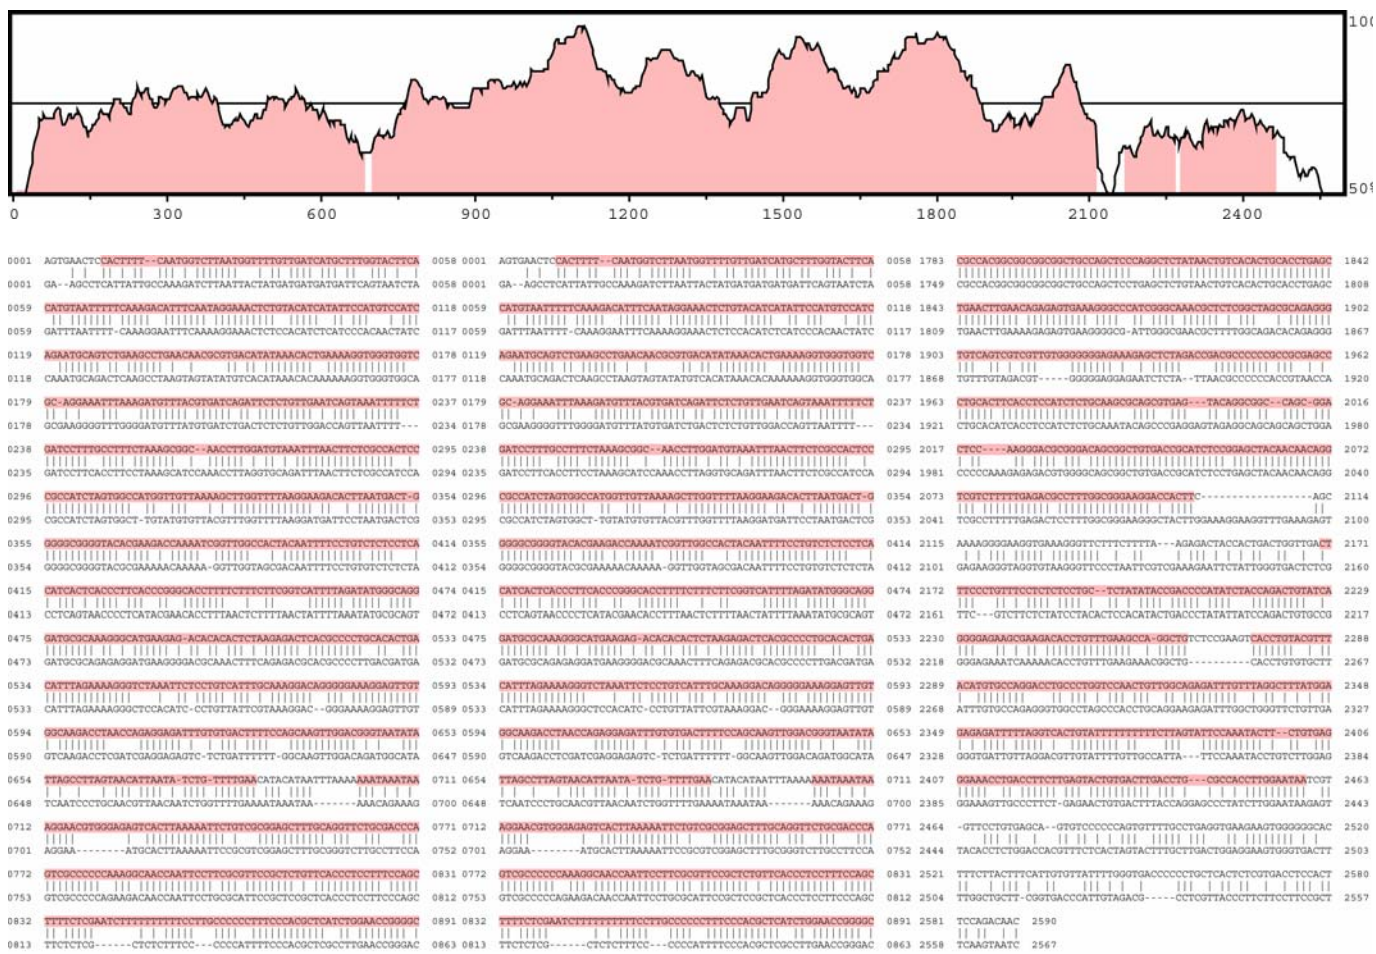

Comparison of the upstream regulatory sequences of the mouse and human Kv4.2 genes performed using the Vista alignment program (mouse is upper sequence in the sequence alignment). A similar approach was used to select regions of the Kv4.2 gene for functional analysis as was used for the Kv2.1 genes. There is greater sequence similarity in the proximal promoter region of the Kv4.2 gene than the Kv2.1 gene and the sequences selected for functional analysis were very similar in length. The selected sequences extend to the initiator methionine of exon 1 of the Kv4.2 gene and makes no assumptions about the exact location of the transcription start site.

## References for Figures 1A, B and C

1. Abbott JA (2005) Heart rate and heart rate variability of healthy cats in home and hospital environments. *J Feline Med Surg* 7:195-202.
2. Akita M, Kuwahara M, Tsubone H, Sugano S (1998) ECG changes during furosemide-induced hypokalemia in the rat. *J Electrocardiol* 31:45-49.
3. Andrews PL, Bower AJ, Illman O (1979) Some aspects of the physiology and anatomy of the cardiovascular system of the ferret, *Mustela putorius furo*. *Lab Anim* 13:215-220.
4. Braesicke K, Parkinson JA, Reekie Y, Man MS, Hopewell L, Pears A, Crofts H, Schnell CR, Roberts AC (2005) Autonomic arousal in an appetitive context in primates: a behavioural and neural analysis. *Eur J Neurosci* 21:1733-1740.
5. Capasso JM, Olivetti G, Anversa P (1989) Mechanical and electrical properties of cardiomyopathic hearts of Syrian hamsters. *Am J Physiol* 257:H1836-H1842.
6. Chu V, Otero JM, Lopez O, Morgan JP, Amende I, Hampton TG (2001) Method for non-invasively recording electrocardiograms in conscious mice. *BMC Physiol* 1:Epub.
7. Conrad LL, Baxter DJ (1963) Effect of manganese on Q-T interval and distribution of calcium in rat heart. *Am J Physiol* 205:1209-1212.
8. DePasquale MJ, Ringer LW, Winslow RL, Buchholz RA, Fossa AA (1994) Chronic monitoring of cardiovascular function in the conscious guinea pig using radio-telemetry. *Clin Exp Hypertens* 16:245-260.
9. Georgakopoulos D, Mitzner WA, Chen CH, Byrne BJ, Millar HD, Hare JM, Kass DA (1998) In vivo murine left ventricular pressure-volume relations by miniaturized conductance micromanometry. *Am J Physiol* 274:H1416-H1422.
10. Hamlin RL, Kijawornrat A, Keene BW (2004) How many cardiac cycles must be measured to permit accurate RR, QT, and QTc estimates in conscious dogs? *J Pharmacol Toxicol Methods* 50:103-108.
11. Hamlin RL, Kijawornrat A, Keene BW, Hamlin DM (2003) QT and RR intervals in conscious and anesthetized guinea pigs with highly varying RR intervals and given QTc-lengthening test articles. *Toxicol Sci* 76:437-442.
12. Hashimoto H, Moritani N, Saito TR (2004) Comparative study on circadian rhythms of body temperature, heart rate, and locomotor activity in three species hamsters. *Exp Anim* 53:43-46.
13. Horii I, Kito G, Hamada T, Jikuzono T, Kobayashi K, Hashimoto K (2002) Development of telemetry system in the common marmoset--cardiovascular effects of astemizole and nicardipine. *J Toxicol Sci* 27:123-130.
14. Howarth FC, Jacobson M, Shafiullah M, Adeghate E (2005) Long-term effects of streptozotocin-induced diabetes on the electrocardiogram, physical activity and body temperature in rats. *Exp Physiol* 90:827-835.
15. Kijawornrat A, Ozkanlar Y, Keene BW, Roche BM, Hamlin DM, Hamlin RL (2006) Assessment of drug-induced QT interval prolongation in conscious rabbits. *J Pharmacol Toxicol Methods* 53:168-173.
16. Kim EJ, Kim KS, Shin WH (2005) Electrophysiological safety of DW-286a, a novel fluoroquinolone antibiotic agent. *Hum Exp Toxicol* 24:19-25.
17. Love JN (1998) The effect of propranolol intoxication on QTc interval in a canine model. *J Emerg Med* 16:1-4.
18. Matsumoto Y, Aihara H, Yamauchi-Kohno R, Reien Y, Ogura T, Yabana H, Masuda Y, Sato T, Komuro I, Nakaya H (2002) Long-term endothelin a receptor blockade inhibits electrical remodeling in cardiomyopathic hamsters. *Circulation* 106:613-619.
19. Milnor WR (1979) Aortic wavelength as a determinant of the relation between heart rate and body size in mammals. *Am J Physiol* 237:R3-6.



20. Mirhashemi S , Breit GA, Chavez Chavez RH, Intaglietta M (1988) Effects of hemodilution on skin microcirculation. *Am J Physiol* 254:H411-H416.
21. Mitchell GF, Jeron A, Koren G (1998) Measurement of heart rate and Q-T interval in the conscious mouse. *Am J Physiol* 274:H747-H751.
22. Moss AJ (1993) Measurement of the QT interval and the risk associated with QTc interval prolongation: a review. *Am J Cardiol* 72:23B-25B.
23. Nolan ER, Girand M, Bailie M, Yeragani VK (2004) Circadian changes in the QT variability index in the beagle dog. *Clin Exp Pharmacol Physiol* 31:783-785.
24. Qin F, Rounds NK, Mao W, Kawai K, Liang CS (2001) Antioxidant vitamins prevent cardiomyocyte apoptosis produced by norepinephrine infusion in ferrets. *Cardiovasc Res* 51:736-748.
25. Rousseau D, Helies-Toussaint C, Moreau D, Raederstorff D, Grynberg A (2003) Dietary n-3 PUFAs affect the blood pressure rise and cardiac impairments in a hyperinsulinemia rat model in vivo. *Am J Physiol Heart Circ Physiol* 285:H1294-H1302.
26. Schnell CR, Wood JM (1993) Measurement of blood pressure and heart rate by telemetry in conscious, unrestrained marmosets. *Am J Physiol* 264:H1509-H1516.
27. Schultz RA, Pretorius PJ (1972) An electrocardiographic study of normal goats and cattle using a modified technique. *Onderstepoort J Vet Res* 39:209-223.
28. Schultz RA, Pretorius PJ, Terblanche M (1972) An electrocardiographic study of normal sheep using a modified technique. *Onderstepoort J Vet Res* 39:97-106.
29. Segers P, Georgakopoulos D, Afanasyeva M, Champion HC, Judge DP, Millar HD, Verdonck P, Kass DA, Stergiopoulos N, Westerhof N (2005) Conductance catheter-based assessment of arterial input impedance, arterial function, and ventricular-vascular interaction in mice. *Am J Physiol Heart Circ Physiol* 288:H1157-H1164.
30. Skarda RT, Muir WW, Milne DW, Gabel AA (1976) Effects of training on resting and postexercise ECG in standardbred horses, using a standardized exercise test. *Am J Vet Res* 37:1485-1488.
31. Smith SH, Bishop SP (1985) The electrocardiogram of normal ferrets and ferrets with right ventricular hypertrophy. *Lab Anim Sci* 35:268-271.
32. Stramba-Badiale M, Locati EH, Martinelli A, Courville J, Schwartz PJ (1997) Gender and the relationship between ventricular repolarization and cardiac cycle length during 24-h Holter recordings. *Eur Heart J* 18:1000-1006.
33. Too K, Nakamura R, Hirao K (1958) Studies on applications of electrocardiogram in cattle. *Jap. J. Vet. Res.* 6:230-244.
34. Tsuji Y, Opthof T, Yasui K, Inden Y, Takemura H, Niwa N, Lu Z, Lee JK, Honjo H, Kamiya K, et al. (2002) Ionic mechanisms of acquired QT prolongation and torsades de pointes in rabbits with chronic complete atrioventricular block. *Circulation* 106:2012-2018.
35. Upadhyay RC, Sud SC, Joshi HC, Bahga HS (1976) Electrocardiographic studies in Jersey cattle. *Indian Vet. J.* 53:953-961.
36. Valadao CAA, Teixeira Neto FJ, Marques JA (2000) Evaluation of the effect of hyoscine-N-butyl bromide on the cardiovascular actions of detomidine in the horse. *Braz. J. Vet. Res. Anim. Sci.* 37:Epub.
37. Vischer CM, Foreman JH, Constable PD, Benson GJ, Kline KH, Freeman DE, Campbell KL, Grubb TL (1999) Hemodynamic effects of thyroidectomy in sedentary horses. *Am J Vet Res* 60:14-21.
38. Yoshida H, Sugiyama A, Satoh Y, Ishida Y, Yoneyama M, Kugiyama K, Hashimoto K (2002) Comparison of the in vivo electrophysiological and proarrhythmic effects of amiodarone with those of a selective class III drug, sotalolol, using a canine chronic atrioventricular block model. *Circ J* 66:758-762.
